# Supplementary material for: Mutation in Genes Encoding Key Functional Groups Additively Increase Mortality in Patients with BRAFV600E-Mutant Advanced Papillary Thyroid Carcinoma
Source: MDPI journal article supplement (doi:10.3390/cancers13225846), 2021-11-22
Supplement: s1 [file s1]

# Supplementary Materials: Mutation in Genes Encoding Key Functional Groups Additively Increase Mortality in Patients with *BRAF*<sup>V600E</sup>-Mutant Advanced Papillary Thyroid Carcinoma

Eyun Song, Meihua Jin, Ahreum Jang, Min Ji Jeon, Dong Eun Song, Hye Jin Yoo, Won Bae Kim, Young Kee Shong and Won Gu Kim

**Table S1.** List of 50 target genes.

| <i>TERT</i> promoter | <i>BRAF</i>   | <i>NRAS</i>    | <i>HRAS</i>   | <i>KRAS</i>    |
|----------------------|---------------|----------------|---------------|----------------|
| <i>EIF1AX</i>        | <i>TP53</i>   | <i>RB1</i>     | <i>NF1</i>    | <i>NF2</i>     |
| <i>PTEN</i>          | <i>PIK3CA</i> | <i>ATM</i>     | <i>MEN1</i>   | <i>ARID1B</i>  |
| <i>TSHR</i>          | <i>MED12</i>  | <i>RBM10</i>   | <i>ARID2</i>  | <i>POLE</i>    |
| <i>PPM1D</i>         | <i>STK11</i>  | <i>CHEK2</i>   | <i>ZFHX3</i>  | <i>BDP1</i>    |
| <i>KMT2A</i>         | <i>KMT2C</i>  | <i>TG</i>      | <i>EZH1</i>   | <i>APC</i>     |
| <i>AKT1</i>          | <i>SPOP</i>   | <i>ALK</i>     | <i>RET</i>    | <i>PIK3C2G</i> |
| <i>PIK3CG</i>        | <i>AKT3</i>   | <i>TSC2</i>    | <i>MTOR</i>   | <i>ARID1A</i>  |
| <i>ARID1B</i>        | <i>ARID5B</i> | <i>SMARCB1</i> | <i>PBRM1</i>  | <i>ATRX</i>    |
| <i>KMT2D</i>         | <i>MSH2</i>   | <i>FGFR3</i>   | <i>PDGFRB</i> | <i>ERBB3</i>   |
